# Supplementary material for: Calnexin is necessary for T cell transmigration into the central nervous system
Source: JCI journal article supplement (doi:10.1172/jci.insight.98410), 2018-03-07
Supplement: sd1 [file 1]

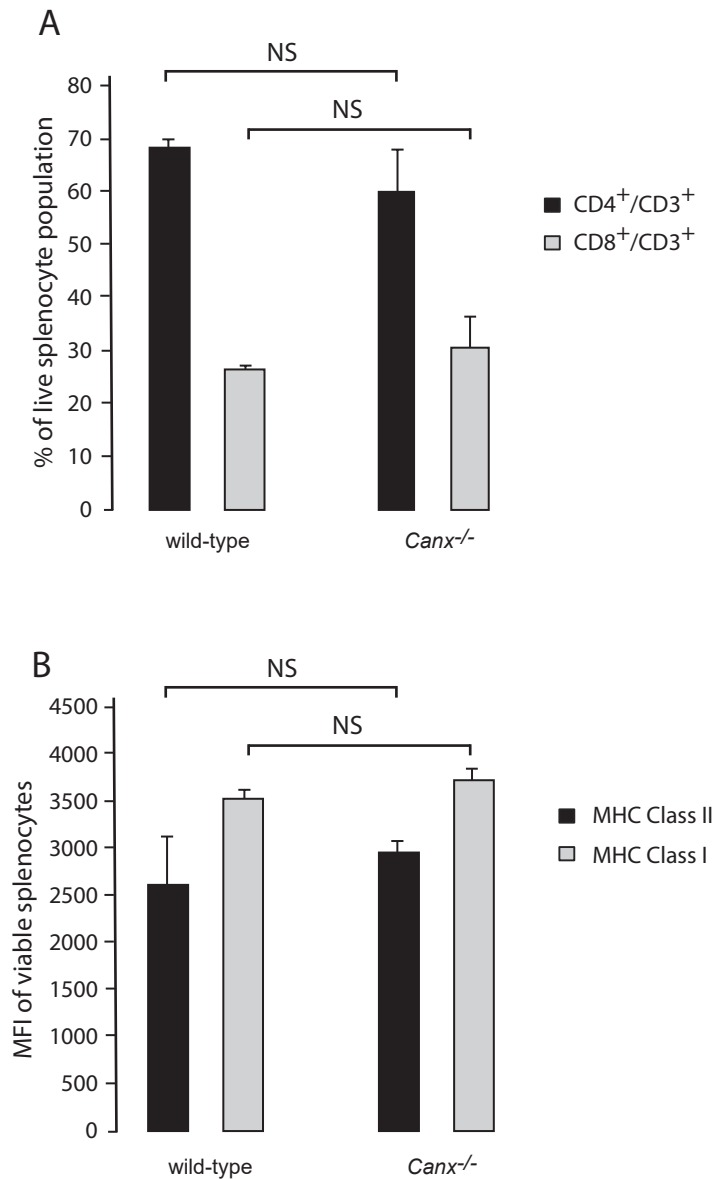

### Supplemental Figure S1

Splenocytes from wild-type and calnexin-deficient EAE mice were stimulated *in vitro* with MOG35–55 peptide.

**A.** CD4<sup>+</sup>/CD3<sup>+</sup> and CD8<sup>+</sup>/CD3<sup>+</sup> T-cell populations were analyzed by flow cytometry

**B.** MHC I and MHC II population of splenocytes were analyzed by flow cytometry, MFI (mean fluorescence intensity). Data represented as mean ± SEM of three replicates of three independent experiments.

The means were compared using unpaired Student's t-test.

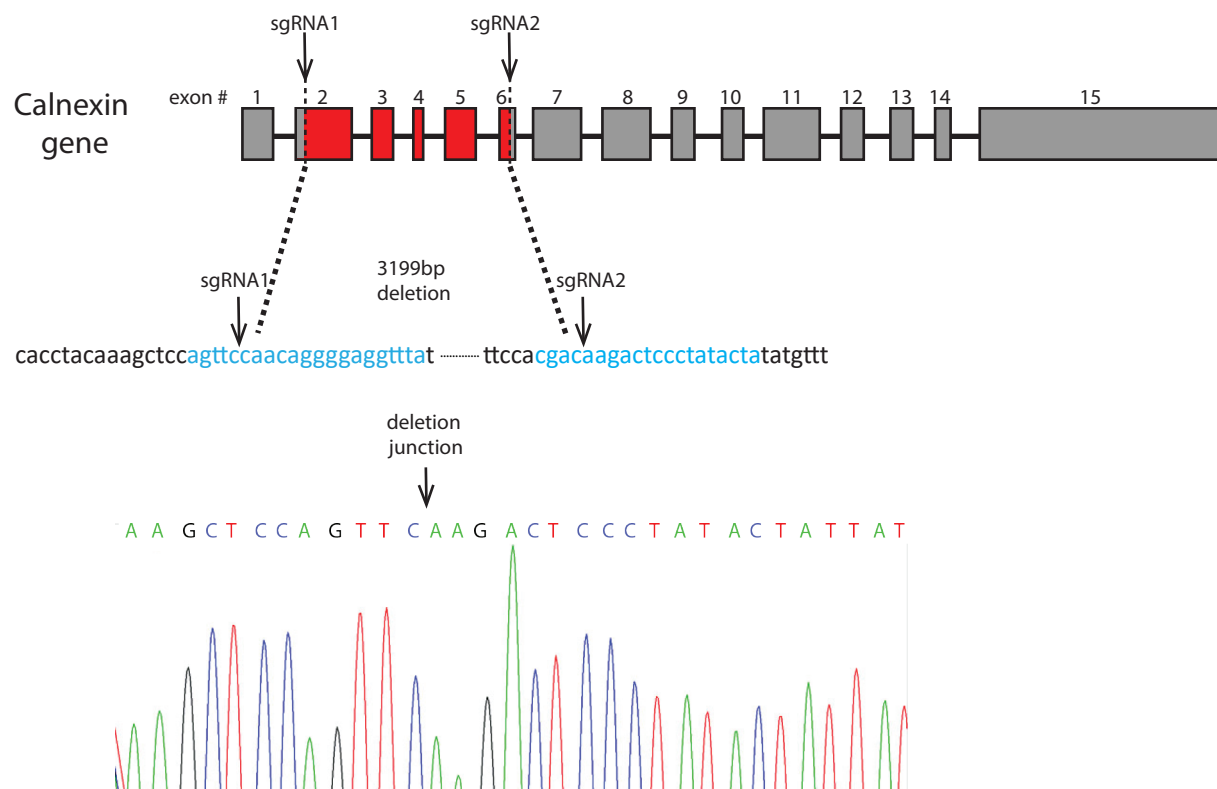

### Supplemental Figure S2

Disruption of the calnexin gene in the bEND.3 cell using *in situ* gene editing.

### Supplemental Table S1

#### Summary of Clinical Data

| Sample Type | No. of patients | Males | Females | Age at death |         | Post Mortem Delay |         | MS disease duration |        |
|-------------|-----------------|-------|---------|--------------|---------|-------------------|---------|---------------------|--------|
|             |                 |       |         | Mean         | Range   | Mean              | Range   | Mean                | Range  |
| Controls    | 10              | 8     | 2       | 66.1         | 28 - 88 | 22.8              | 15 - 33 | -                   | -      |
| MS          | 18              | 7     | 11      | 53.6         | 35 - 74 | 22.5              | 8 - 56  | 18.1                | 2 - 34 |

MS, Multiple Sclerosis

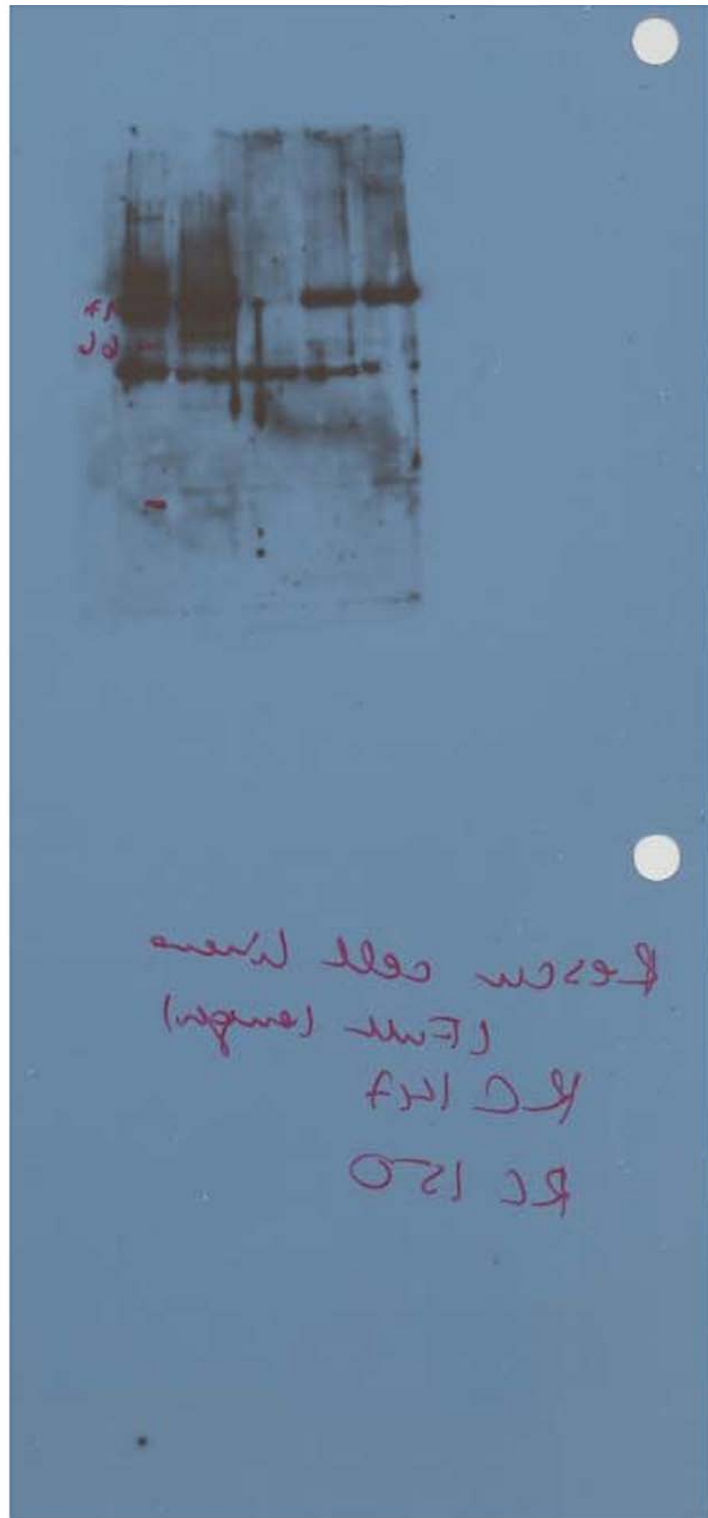

full unedited gel for Figure 4B

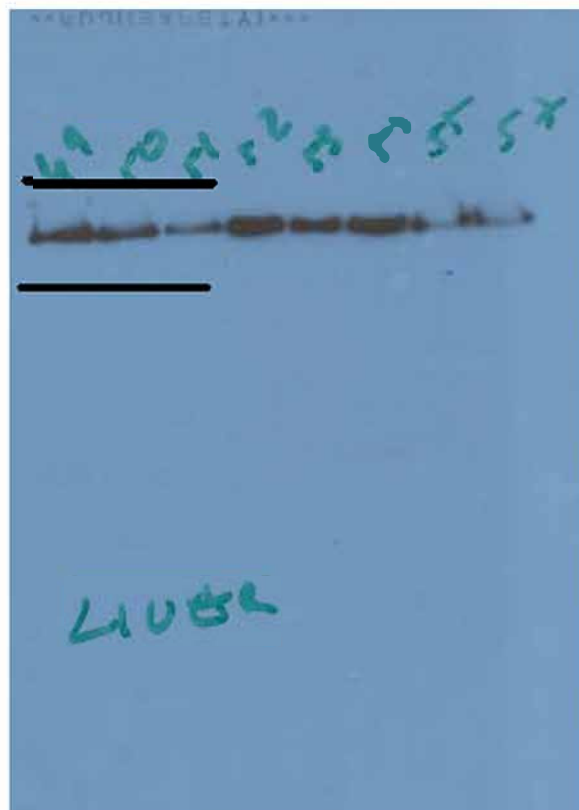

full unedited gel for the Figure 6A liver

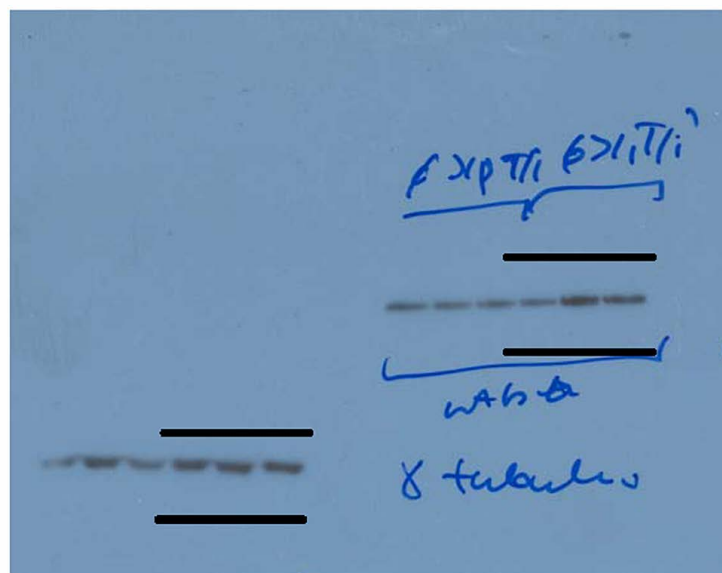

full unedited gel for the Figure 7A

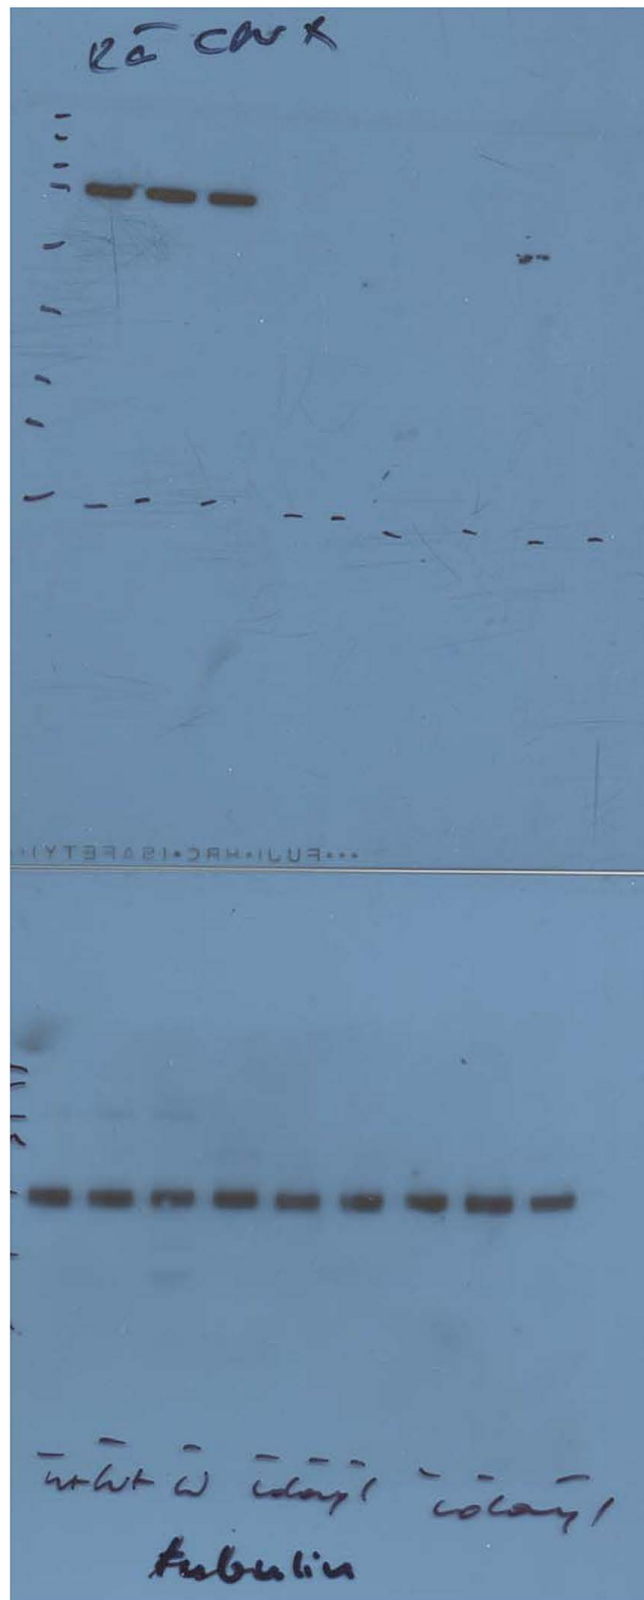

full unedited gel for the Figure 7B anti-calnexin (upper gel) + loading control (lower gel)

empty lane removed in the final Figure

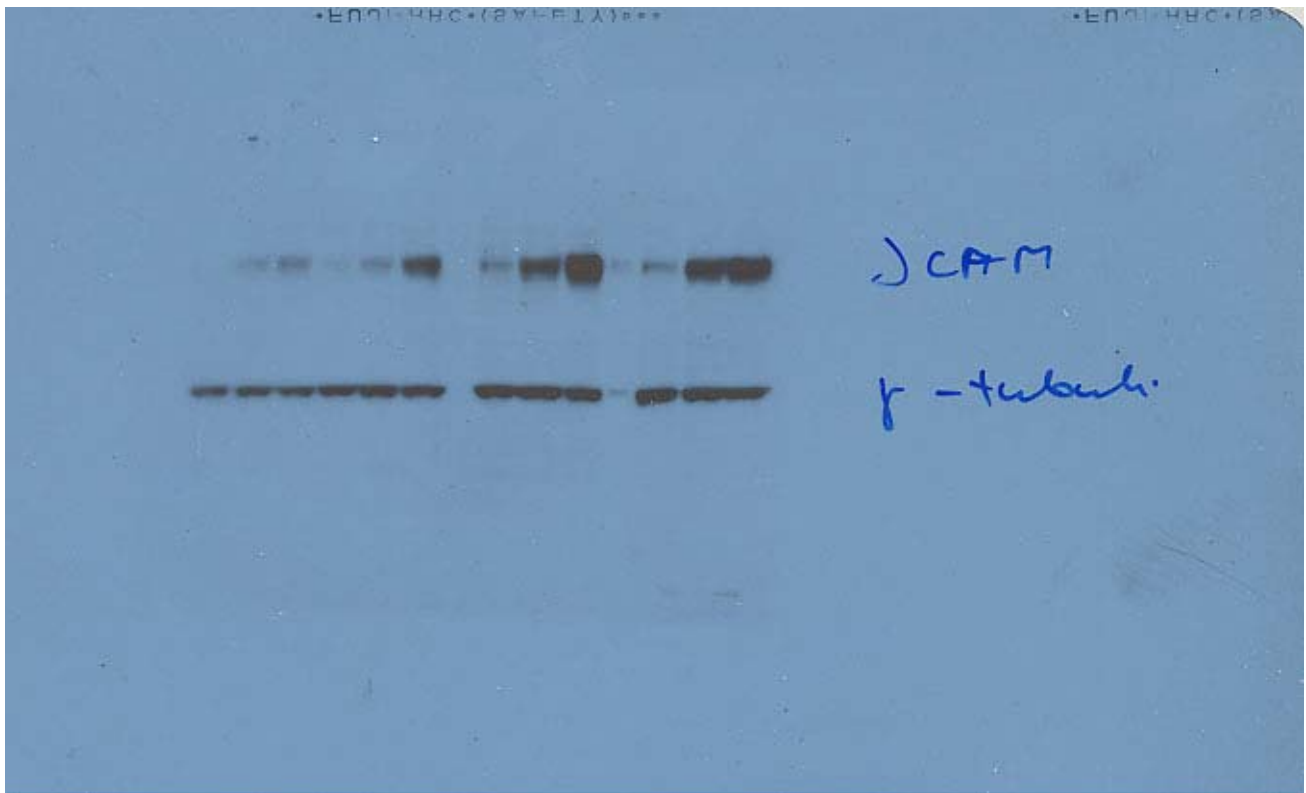

full unedited gel for the Figure 7C anti-VCAM + loading control

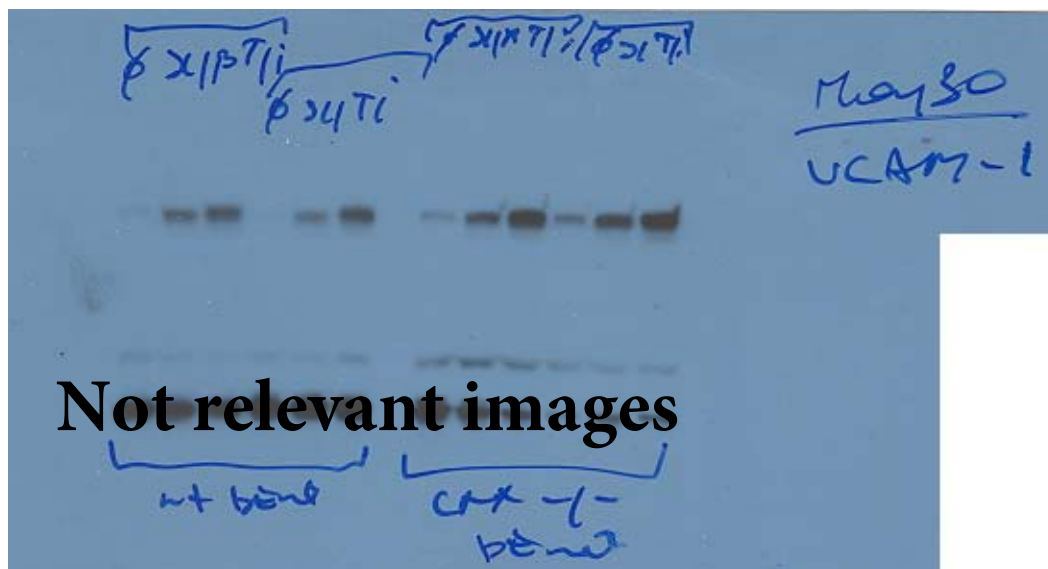

full unedited gel for the Figure 7C anti-VCAM

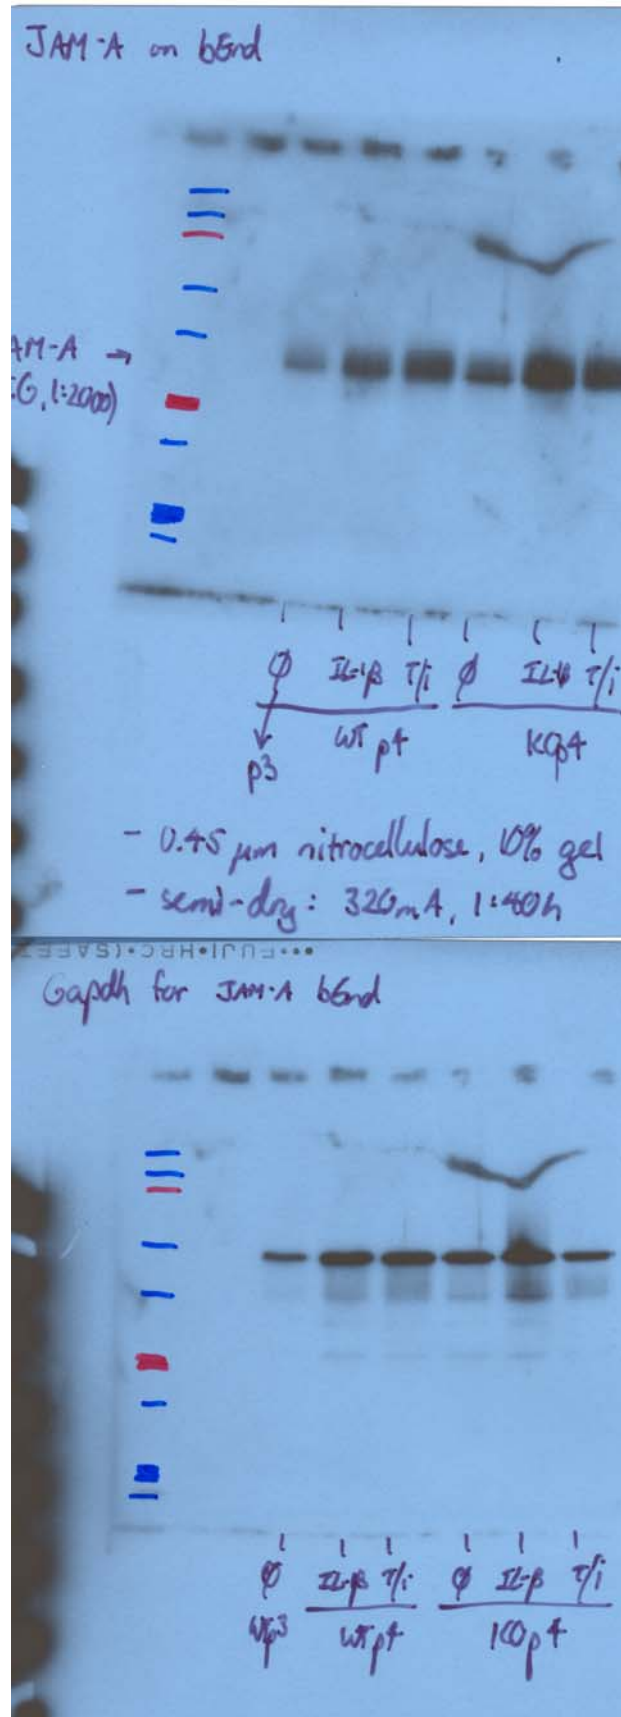

full unedited gel for the Figure 7D anti-JAM-A (upper gel) + loading control (lower gel)

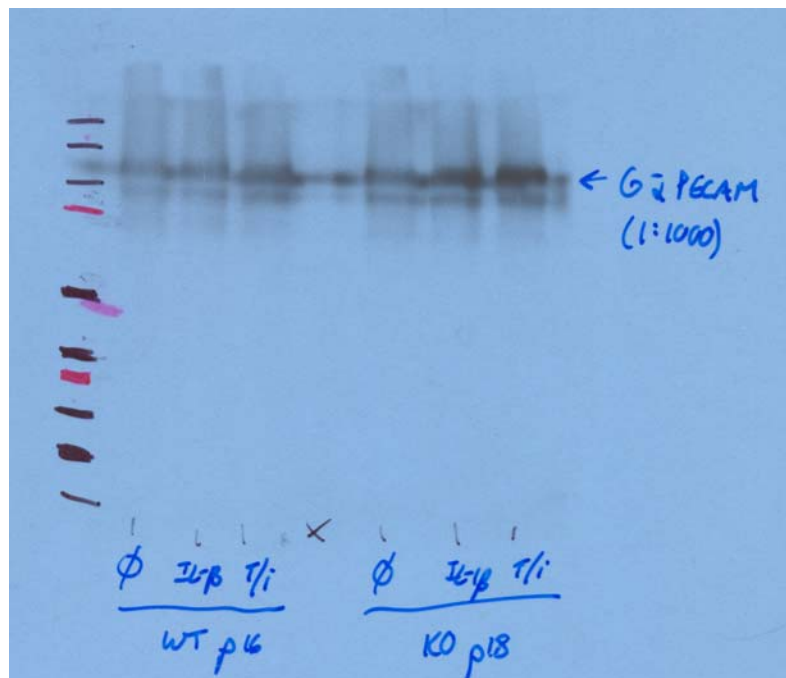

full unedited gel for the Figure 7D anti-PECAM
